# Supplementary material
Source: PubMed Central journal article supplement (PMC3183811)
Supplement: mmc1.pdf [file mmc1.pdf]

## Supporting Material - Binding of the molecular chaperone $\alpha$ B-crystallin to $A\beta$ amyloid fibrils inhibits fibril elongation

Sarah L. Shammass,<sup>†\*</sup> Christopher A. Waudby,<sup>‡</sup> Shuyu Wang,<sup>†</sup> Alexander K. Buell,<sup>†§</sup>, Heath Ecroyd,<sup>¶</sup> Mark E. Welland,<sup>§</sup> John A. Carver,<sup>||</sup> Christopher M. Dobson,<sup>†</sup> and Sarah Meehan<sup>†</sup>

<sup>†</sup>Department of Chemistry, University of Cambridge, Cambridge, United Kingdom

<sup>‡</sup>Department of Structural Molecular Biology, University College London, London, United Kingdom

<sup>§</sup>Nanoscience Centre, University of Cambridge, Cambridge, United Kingdom

<sup>¶</sup>School of Biological Sciences, University of Wollongong, Wollongong, Australia

<sup>||</sup>School of Chemistry and Physics, University of Adelaide, Adelaide, Australia

\*Correspondence: sls42@cam.ac.uk

## Materials & Methods

### Materials

ThT (purchased from Sigma-Aldrich, Gillingham, UK) was purified prior to use by dissolving the supplied solid in tetrahydrofuran, and recovering by filtration three times. The final solid was dried under reduced pressure. A $\beta$  peptides were purchased from Bachem Ltd (Weil am Rhein, Germany). Stock solutions of A $\beta_{42}$  and A $\beta_{42arc}$  were initially prepared as follows. The peptide (1 mg) was dissolved in 1 mL of 10 mM sodium hydroxide, and the resulting solution placed for 5 min in an ultrasonic bath to remove pre-formed aggregates. The solution was then divided into aliquots and stored at -80°C until required for use. The concentration of the stock peptide solution was determined by quantitative amino acid analysis (Biochemistry Department, University of Cambridge). This stock solution was later used in preparing low molecular weight (LMW) A $\beta_{42arc}$  and in preparing A $\beta_{42}$  and A $\beta_{42arc}$  fibrils (see below).  $\alpha_B$ -Crystallin and GFP were expressed and purified according to previously published protocols (1, 2). UCH-L3 was kindly provided by Fredrik Andersson (Department of Chemistry, University of Cambridge).

### Preparation of A $\beta$ fibrils for pelleting assays and seeds

Aliquots of frozen A $\beta$  stock solutions were thawed rapidly, and diluted with buffer A (50 mM sodium phosphate pH 7.4) to a final A $\beta$  concentration of 30  $\mu$ M. The solution was incubated without agitation for 18-96 h at 30°C until fibril formation (as assessed by measuring the  $\beta$ -sheet content in circular dichroism). Fibrils were then stored at room temperature until required for further study. Analytical SEC of supernatants collected after centrifugation of such solutions detected no LMW A $\beta$ . The detection sensitivity (estimated using stocks of known A $\beta$  concentrations) implied that the solutions must be at least 96 % fibrillar.

### Preparation of low molecular weight (LMW) A $\beta$ solutions for plate reader assays

LMW A $\beta_{42}$  was prepared by dissolving in trifluoroacetic acid, and sonicating for 30 s on ice. The trifluoroacetic acid was removed by lyophilization, and the peptide was then dissolved in 1,1,1,3,3,3-hexafluoro-2-propanol and divided into aliquots that were dried by rotary evaporation at room temperature. The amount of peptide in the individual aliquots was determined by quantitative amino acid analysis (Biochemistry Department, University of Cambridge). LMW A $\beta_{42arc}$  peptides for the amyloid fibril elongation studies were prepared by diluting a 50  $\mu$ L aliquot of stock solution directly into buffer A to an A $\beta_{42arc}$  concentration of approximately 30  $\mu$ M, and filtering through a 10 kDa filter (Centricon-Y10) by centrifugation for 30 min at 14,000  $\times g$  (4°C). The filtrate (LMW A $\beta_{42arc}$ ) was stored on ice until use, and its concentration determined by quantitative amino acid analysis (Biochemistry Department, University of Cambridge).

### Binding of $\alpha_B$ -crystallin to A $\beta$ fibrils by centrifugation and SDS-PAGE

$\alpha_B$ -Crystallin, UCH-L3 and GFP were incubated at a final concentration of 12  $\mu$ M for 1 h at room temperature in buffer A, in the presence and absence of 12  $\mu$ M A $\beta_{42}$  fibrils, and then centrifuged at 16,000  $\times g$  for 30 min. The supernatant was carefully removed and analysed by SDS-PAGE (4-12% Bis-Tris, Invitrogen), together with equivalent  $\alpha_B$ -crystallin supernatants (above).

To quantify the strength of the binding interaction, A $\beta$  fibrils were diluted to a final concentration of 15  $\mu$ M with  $\alpha_B$ -crystallin in buffer A, to a range of different  $\alpha_B$ -crystallin concentrations. The mixtures were incubated for 1 h at room temperature to facilitate binding, and then spun at 16,000  $\times g$  for 30 min. The supernatant was removed and analysed by fluorescence spectroscopy using a Cary Eclipse spectrophotometer (Santa Clara, USA) to calculate the concentration of unbound  $\alpha_B$ -crystallin.  $\alpha_B$ -Crystallin solutions were kept on ice until transfer into a 3 mm pathlength fluorescence quartz cuvette. The intrinsic tryptophan fluorescence was then determined by excitation at 280 nm (5 nm slit) and the emission was measured from 300 to 500 nm (5 nm slit) with 0.1 s averaging. The fluorescence intensity at 342 nm was used to indicate the  $\alpha_B$ -crystallin concentration. The total concentration of  $\alpha_B$ -crystallin was calculated from fluorescence measurements of a similarly prepared set of  $\alpha_B$ -crystallin standards (of known concentration), without A $\beta$  fibrils and not subjected to centrifugation. The concentration of  $\alpha_B$ -crystallin bound to fibrils was identified as the difference between the  $\alpha_B$ -crystallin concentration initially and in the supernatant following centrifugation. The dissociation constant ( $K_d$ ) was estimated by direct non-linear regression according to Eq. 1:

$$L_B = \frac{S_T \times L_F}{K_d + L_F} \quad (1)$$

where  $L_B$  and  $L_F$  are the concentrations of bound and free  $\alpha_B$ -crystallin respectively,  $S_T$  is the concentration of binding sites, and  $K_d$  is the dissociation constant of the complex. This approach provides better estimates of  $K_d$  and  $S_T$  than straight line fitting of conventional Scatchard plots.

In determining the effect of ionic strength upon the process, the procedure used was identical to that above, with initial concentrations of  $\alpha_B$ -crystallin and A $\beta_{42}$  fibrils of 15  $\mu$ M, and the addition of NaCl to the incubation mixture (to final concentrations of 0 M, 0.5 M, 1.0 M and 1.5 M). Control experiments performed with  $\alpha_B$ -crystallin but no A $\beta_{42}$  fibrils displayed a small decrease (of around 3 %) in tryptophan fluorescence following the centrifugation, possibly reflecting a change in  $\alpha_B$ -crystallin self-association behaviour. Consequently, the  $\alpha_B$ -crystallin supernatant concentrations following centrifugation were compared (and are reported) relative to the concentrations found for solutions of the same ionic strength but without A $\beta_{42}$  fibrils. Experiments were performed in triplicate, and errors were calculated by combining the errors (estimated from the standard deviation) in quadrature.

## Immunoelectron microscopy

The fibril-chaperone complex for immuno-EM was obtained by the addition of  $\alpha_B$ -crystallin to A $\beta$  fibrils in buffer A, with final concentrations of 3.5  $\mu$ M and 15  $\mu$ M respectively. The mixture was incubated for 1 h at room temperature and then spun at 16,000  $\times g$  for 30 min. The supernatant was carefully aspirated to remove free  $\alpha_B$ -crystallin and the pellet resuspended in one volume of buffer A, prior to dilution for immunogold labelling as required. Charged carbon-coated nickel electron microscopy grids (400 mesh; Agar Scientific, Stansted, UK) were prepared for this study by the addition of 4  $\mu$ L of a 100-fold dilution of the fibril-chaperone complex in buffer A (final concentrations 150 nM A $\beta$  fibrils and 35 nM  $\alpha_B$ -crystallin). Samples were deposited onto grids immediately following dilution. Grids were thrice washed with 10  $\mu$ L H<sub>2</sub>O, blocked with 15  $\mu$ L 0.1% (w/v) bovine serum albumin (BSA) in buffer B (10 mM sodium phosphate, 100 mM sodium chloride pH 7.4) for 15 min, then incubated for 30 min with the  $\alpha_B$ -crystallin monoclonal primary

antibody (100  $\mu\text{g/ml}$ , Assay Designs, Michigan, USA) diluted 250-fold in 0.1% BSA in buffer B. The grids were blotted with filter paper between each washing step. Next, the grids were thrice washed with 50  $\mu\text{L}$  0.1% BSA in buffer B, for 4 min each time, before a 30 min incubation at room temperature with goat anti-mouse 10 nm immunogold conjugate (GMHL10, BBInternational, Cardiff, UK), diluted 150-fold into 0.1% BSA in buffer B. The grids were then thrice washed with 50  $\mu\text{L}$  0.1% BSA in buffer B, again for 4 min each time, then thrice with 50  $\mu\text{L}$   $\text{H}_2\text{O}$  and negatively stained with 20  $\mu\text{L}$  of uranyl acetate (2% (w/v) in  $\text{H}_2\text{O}$ ); Agar Scientific, Stansted, UK). Samples were viewed under 20-80k magnifications at 80 kV excitation voltages using a Philips CM100 transmission electron microscope.

### **Effect of $\alpha_B$ -crystallin on seeded growth of $A\beta$ fibrils**

ThT fluorescence measurements were performed in black 96-well half-area plates (Corning) using a FLUOstar fluorescence platereader (BMG Labtech, Offenburg, Germany). To investigate the effect of  $\alpha_B$ -crystallin on seeded growth in solution, fibril solutions were pre-incubated with  $\alpha_B$ -crystallin (at a molar ratio of 2:1) for 1 h prior to the elongation experiment. This ratio of  $A\beta$ : $\alpha_B$ -crystallin was demonstrated to result in near maximal fibril coverage by  $\alpha_B$ -crystallin (see Fig. 2). As a control, the same concentrations of all components were also investigated without pre-incubation. LMW  $A\beta$  solutions were kept on ice until required. The final concentrations of LMW  $A\beta_{42}$  and  $A\beta_{42arc}$  were 9.7  $\mu\text{M}$  and 1.8  $\mu\text{M}$  respectively. Where present the concentrations of ThT,  $\alpha_B$ -crystallin and  $A\beta$  fibril seeds were 18.5  $\mu\text{M}$ , 0.74  $\mu\text{M}$  and 0.38  $\mu\text{M}$  respectively. The concentration of LMW  $A\beta_{42arc}$  used is lower than that for LMW  $A\beta_{42}$ , because the former is extremely aggregation prone, and lower concentrations were required to observe a clear difference between the aggregation rates of seeded and unseeded solutions. Three replicates were performed for each condition, and the average gradient of the linear fits to the initial 1000 s (for  $A\beta_{42}$ ) or 200 s (for  $A\beta_{42arc}$ ) was calculated to report on the initial rate of fibril elongation.

### **Quartz crystal microbalance measurements of fibril elongation**

We probed the inhibitory effect of  $\alpha_B$ -crystallin on the  $A\beta_{42}$  amyloid fibril elongation rate using an E4 quartz crystal microbalance (QCM)(Q-Sense, Västra Frölunda, Sweden) and QSX 301 gold-coated quartz crystals. The functionalization with  $A\beta_{42}$  was performed as described in detail previously (3). Briefly,  $A\beta_{42}$  seed fibrils were coupled to a self-assembled monolayer of mercaptoundecanoic acid (MUA) using standard amine coupling. The remaining activated MUA was passivated with a solution of ethanolamine, after which the QCM crystal was rinsed with water and inserted into the flow cell. After a stable baseline was established, the surface-bound seed fibrils were incubated with a solution of 1.67  $\mu\text{M}$  soluble  $A\beta_{42}$  in buffer C (100 mM sodium phosphate, pH 7.4). The elongation of the seed fibrils led to a decrease in the resonant frequency (see Fig. 4), indicating elongation of the surface-bound fibrils. To stop the growth, the liquid cell was rinsed with buffer C. Subsequently, the sensor surface was exposed to a solution of 2.5  $\mu\text{M}$   $\alpha_B$ -crystallin and then, after again flushing with buffer C, with the same  $A\beta_{42}$  solution as before. Atomic force microscopy images of the QCM sensors were acquired of the functionalized sensors using a Molecular Imaging Pico Plus AFM (Tempe, AZ), using tapping mode in air.

## References

1. Meehan, S., T. P. J. Knowles, A. J. Baldwin, J. F. Smith, A. M. Squires, P. Clements, T. M. Treweek, H. Ecroyd, G. G. Tartaglia, M. Vendruscolo, C. E. Macphee, C. M. Dobson, and J. A. Carver, 2007. Characterisation of amyloid fibril formation by small heat-shock chaperone proteins human alphaA-, alphaB- and R120G alphaB-crystallins. *J Mol Biol* 372:470–484.
2. Huang, J., T. D. Craggs, J. Christodoulou, and S. E. Jackson, 2007. Stable intermediate states and high energy barriers in the unfolding of GFP. *J Mol Biol* 370:356–371.
3. Buell, A. K., C. M. Dobson, T. P. J. Knowles, and M. E. Welland, 2010. Interactions between amyloidophilic dyes and their relevance to studies of amyloid inhibitors. *Biophys J* 99:3492–3497.

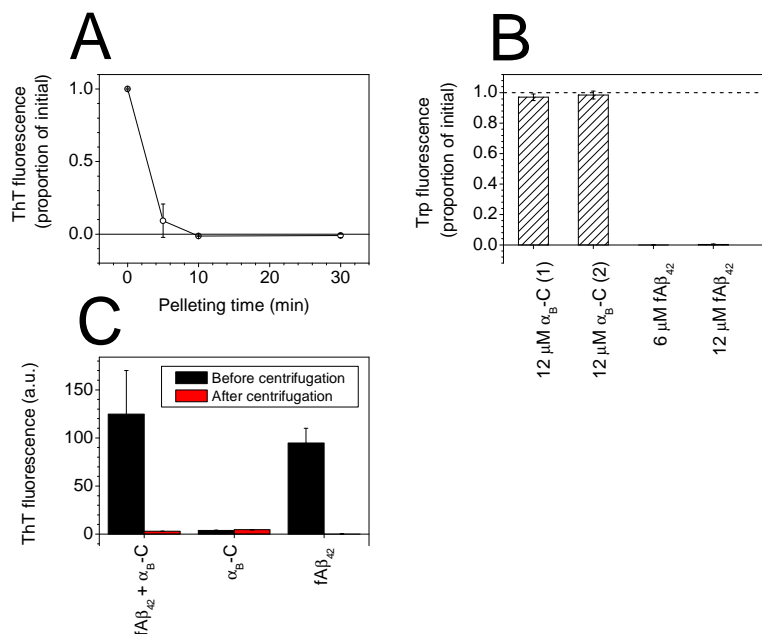

**Figure S1.**

Centrifugation for 30 min at  $16,000 \times g$  is sufficient to pellet  $A\beta$  fibrils, but not soluble  $\alpha_B$ -crystallin. All error bars represent the standard deviation of triplicate measurements. (A) The concentration of  $A\beta_{40}$  fibrils remaining in the supernatant was monitored as a function of centrifugation time through the use of ThT fluorescence measurements. A  $30 \mu\text{M}$  solution of  $A\beta_{40}$  fibrils in buffer A was centrifuged at  $16,000 \times g$ , and  $3 \mu\text{l}$  aliquots removed at various timepoints. The aliquots were mixed with  $20 \mu\text{M}$  ThT in buffer A and the fluorescence intensity recorded immediately. ThT fluorescence intensity is reported relative to the ThT fluorescence prior to centrifugation. (B) Solutions of  $12 \mu\text{M}$   $\alpha_B$ -crystallin alone (1 and 2 represent independent replicates) and 6 and  $12 \mu\text{M}$   $A\beta_{42}$  fibrils alone were prepared by dilution of stock solutions with buffer A and centrifuged at  $16,000 \times g$  for 30 min. The tryptophan fluorescence of the supernatant is reported as a proportion of the intrinsic tryptophan fluorescence of a freshly prepared  $12 \mu\text{M}$   $\alpha_B$ -crystallin solution. Concentrations of soluble  $\alpha_B$ -crystallin in the supernatant were the same within error as those prior to centrifugation. Centrifuged  $A\beta_{42}$  fibrils did not display significant tryptophan fluorescence. (C)  $A\beta_{42}$  fibrils still sediment under the applied centrifugation conditions in the presence of  $\alpha_B$ -crystallin. Solutions containing  $15 \mu\text{M}$   $A\beta_{42}$  fibrils,  $15 \mu\text{M}$   $\alpha_B$ -crystallin, and  $15 \mu\text{M}$   $A\beta_{42}$  fibrils with  $15 \mu\text{M}$   $\alpha_B$ -crystallin were incubated at room temperature for one hour, and  $2 \mu\text{l}$  aliquots removed for ThT fluorescence measurements before, and after, centrifugation for 30 min at  $16,000 \times g$ . The aliquots were mixed with  $20 \mu\text{M}$  ThT in buffer A and the fluorescence intensity recorded immediately. After centrifugation of the mixture, a small but non-zero fluorescence signal remained. However this was similar to the signal found in the absence of  $A\beta_{42}$  fibrils, and therefore reflects ThT binding to alphaCB rather than incomplete pelleting of  $A\beta_{42}$  fibrils.

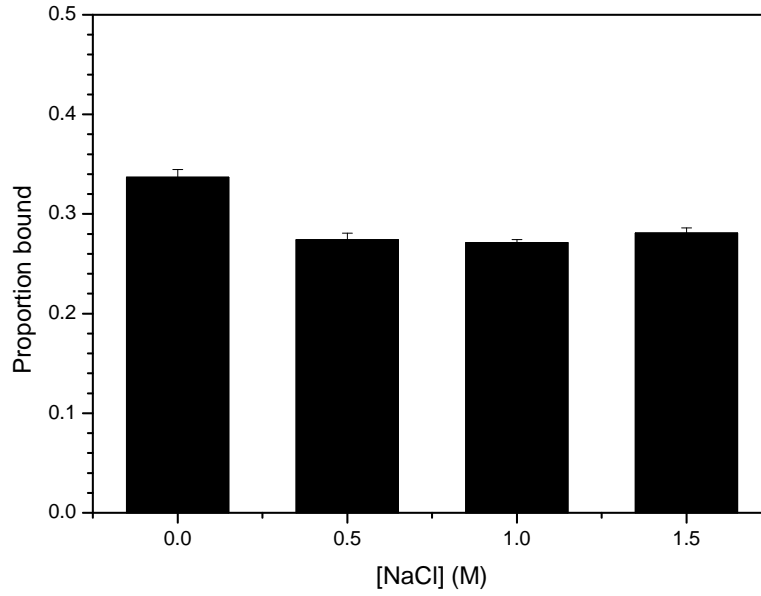

**Figure S2.**

Ionic strength dependence of the cosedimentation behaviour of  $\alpha_B$ -crystallin and  $A\beta_{42}$  fibrils. Solutions containing  $15 \mu\text{M}$   $A\beta_{42}$  fibrils with  $15 \mu\text{M}$   $\alpha_B$ -crystallin and NaCl (0 M, 0.5 M, 1.0 M and 1.5 M) in buffer A were incubated at room temperature for one hour, and the supernatant analysed for  $\alpha_B$ -crystallin concentration after centrifugation for 30 min at  $16,000 \times g$ . By comparing the  $\alpha_B$ -crystallin concentration obtained with that of equivalent solutions without  $A\beta_{42}$  fibrils, the proportion of  $\alpha_B$ -crystallin bound to the fibrils was calculated. Despite an initial small decrease in amount bound, which could reflect an electrostatic contribution to the binding process, a complex between  $\alpha_B$ -crystallin and  $A\beta_{42}$  fibrils remained even at 1.5 M NaCl.

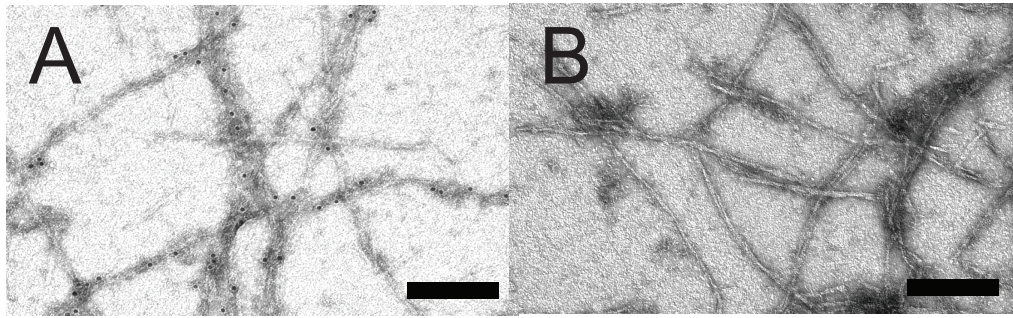

**Figure S3.**

Immunoelectron microscopy of  $A\beta_{40}$  fibrils in (A) the presence, and (B) the absence of  $\alpha_B$ -crystallin. Scale bars represent 200 nm.  $A\beta$  fibrils were prepared and incubated in the presence or absence of an equal molar concentration of  $\alpha_B$ -crystallin for 1 h at room temperature. The mixtures were centrifuged at  $16,000 \times g$  for 30 min, and the pellets resuspended and treated as described in the Methods Section.



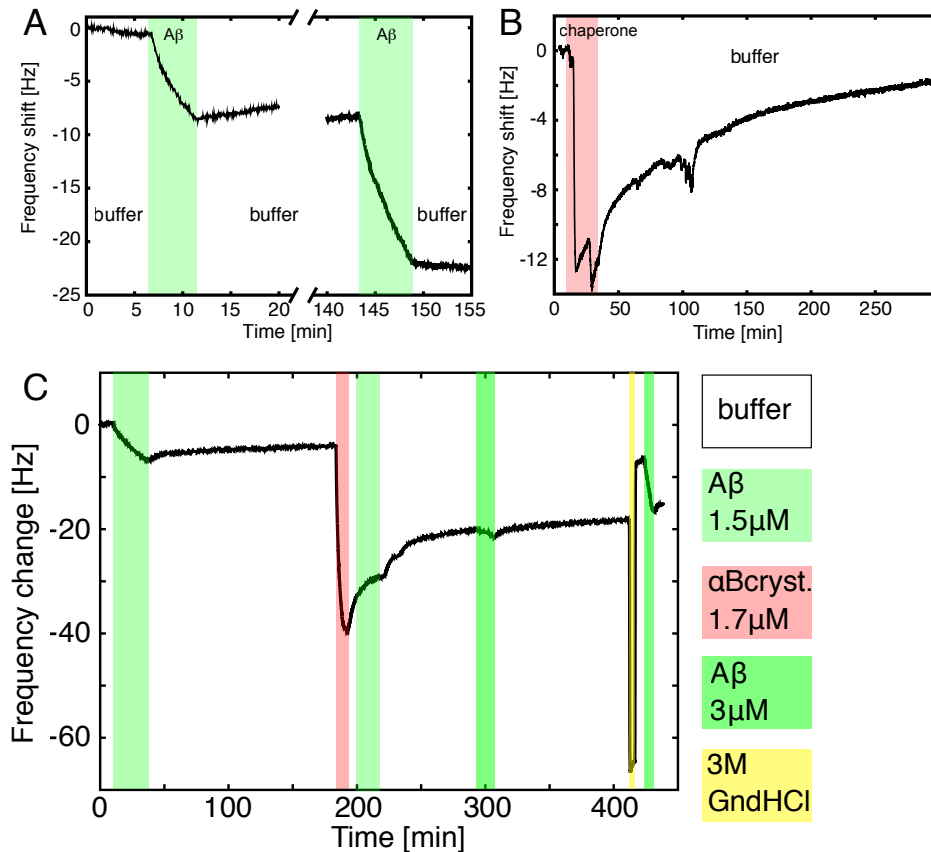

**Figure S4.**

Supplementary QCM experiments. (A) Continued elongation ability of seed fibrils. Following an intervening buffer wash, and without intermittent contact with chaperone, previously elongation competent seed fibrils may be further elongated by renewed contact with LMW  $A\beta_{42}$ . (B) Extent of non-specific interaction of  $\alpha_B$ -crystallin with a passivated control surface without bound  $A\beta_{42}$  fibrils. Some minor non-specific binding occurs, but the signal is significantly smaller than in the presence of fibrils. In addition, the majority of the induced frequency shift is reversible when the surface is flushed for a prolonged period with buffer. (C) Reversibility of chaperone-binding related fibril elongation inhibition demonstrated through a sequence of incubations. Initially, incubation of surface-bound seed fibrils with LMW  $A\beta_{42}$  leads to an increase in mass, demonstrating their elongation competence. Following an incubation with  $\alpha_B$ -crystallin, the seed fibrils are less able to extend, even at a higher concentration of LMW  $A\beta_{42}$ . Subsequent incubation with 3 M GdnHCl results in a mass decrease as  $\alpha_B$ -crystallin is removed from the surface ( $A\beta_{42}$  fibrils do not dissociate under these conditions, data not shown), and a final incubation with LMW  $A\beta_{42}$  demonstrates a restoration in elongation competence.
